# Supplementary material for: Structural basis for isoform-specific kinesin-1 recognition of Y-acidic cargo adaptors
Source: eLife. 2018 Oct 15;7:e38362. doi: 10.7554/eLife.38362 (PMC6214655; doi:10.7554/eLife.38362)
Supplement: Figure 1—source data 1. [file elife-38362-fig1-data1.xlsx]

## Sheet: Sheet1
	Fluorescence Polarization [mP]
KLCTPR [μM]	KLC1TPR:TAMRA-TorsinAC-term			KLC2TPR:TAMRA-TorsinAC-term			KLC1TPR:TAMRA-JIP1C-term			KLC2TPR:TAMRA-JIP1C-term
	repeat 1	repeat 2	repeat 3	repeat 1	repeat 2	repeat 3	repeat 1	repeat 2	repeat 3	repeat 1	repeat 2	repeat 3
0	98	95	92.2	98.7	97.7	97.3	96.9	99.4	98.1	93.4	104.9	96.5
0.1	109.7	107.4	110	103.7	101.7	99.5	109.9	108.7	107.8
0.2	128	128.1	123	104.8	104.6	101.9	130.1	129	128.7	91.7	93.8	90.6
0.5	168.3	168.5	171.8	108.7	103.5	107.5	177.8	174.8	175.8	95.1	91.1	92.7
1	209	209.9	208.7	115.9	112.8	113.5	230.7	231.5	232.4	98.6	98	95.6
2	245.9	244.7	243.5	123.5	126.1	122	268.1	269.6	270.6	105.5	106	104.9
4	286.4	285.9	285.7	141.2	140.6	140.3	290.3	289.7	289.9	120.1	120	122.1
5	299.8	297.4	301.6	147.3	149.4	148.7	296.2	293.4	294.5	124.7	129.4	125.7
7	318.4	317.6	318.6	163.3	164.6	165.7	302.2	303.7	301.3	140.1	138.7	140.5
8	326.8	326.6	326.5	164.4	172.8	169	305.1	306.3	306.8	147.1	145.4	143.5
10	339.1	341.3	340	178.4	183.6	181.2	312.7	312.8	310.8	146.7
15	353.1	357.3	357.6	199.6			325	327.2	326.5	171.4
20	367.7	366.4	366.4	221.6			330			194
