# Supplementary material for: Structural basis for isoform-specific kinesin-1 recognition of Y-acidic cargo adaptors
Source: eLife. 2018 Oct 15;7:e38362. doi: 10.7554/eLife.38362 (PMC6214655; doi:10.7554/eLife.38362)
Supplement: Figure 1—supplement figure 1—source data 1. [file elife-38362-fig1.xlsx]

## Sheet: Sheet1
KLCTPR [μM]	85 mM NaCl KLC1TPR:TAMRA-JIP1C-term			150 mM NaCl KLC1TPR:TAMRA-JIP1C-term			500 mM NaCl KLC1TPR:TAMRA-JIP1C-term			85 mM NaCl KLC1TPR:TAMRA-TorsinAC-term			150 mM NaCl KLC1TPR:TAMRA-TorsinAC-term			500 mM NaCl KLC1TPR:TAMRA-TorsinAC-term
	repeat 1	repeat 2	repeat 3	repeat 1	repeat 2	repeat 3	repeat 1	repeat 2	repeat 3	repeat 1	repeat 2	repeat 3	repeat 1	repeat 2	repeat 3	repeat 1	repeat 2	repeat 3
0	98	99	100	96.9	99.4	98.1	99	101	99	102	106	102	98	95	92.2	107	101	99
0.1	113	112	113	109.9	108.7	107.8				105	105	104	109.7	107.4	110
0.2	147	144	145	130.1	129	128.7				129	128	126	128	128.1	123
0.3	195	196	195							160	155	152
0.5	228	229	220	177.8	174.8	175.8	108	109	104	183	182	177	168.3	168.5	171.8	97	97	97
1	268	265	264	230.7	231.5	232.4	118	116	116	219	218	216	209	209.9	208.7	105	104	106
2	281	283	285	268.1	269.6	270.6				262	260	260	245.9	244.7	243.5
3							157	156	154							124	128	122
4	295	294	294	290.3	289.7	289.9				287	285	286	286.4	285.9	285.7
5	297	297	300	296.2	293.4	294.5	181	179	176	295	295	294	299.8	297.4	301.6	146	148	146
7				302.2	303.7	301.3							318.4	317.6	318.6
8	308	309	309	305.1	306.3	306.8	203	201	202	310	312	311	326.8	326.6	326.5	169	169	167
10	313	316	314	312.7	312.8	310.8	215	211	212	320	318	320	339.1	341.3	340	185	186	186
12	322	311	318				222	224	220	325	324	326				201	201	197
15				325	327.2	326.5	234	231	233	334	333	333	353.1	357.3	357.6	221	220	218
18										342	341	340
20				330			246	248	246				367.7	366.4	366.4	245	245	246
30							265	268	269							279	278	281
40							281	282	280							301	298	299
50							294	293	292							314	314	314
60							300	298	300							322	322	323
