# Supplementary material for: Structural basis for isoform-specific kinesin-1 recognition of Y-acidic cargo adaptors
Source: eLife. 2018 Oct 15;7:e38362. doi: 10.7554/eLife.38362 (PMC6214655; doi:10.7554/eLife.38362)
Supplement: Figure 3—figure supplement 5—source data 1. [file elife-38362-fig3-figsupp5-data1.xlsx]

## Sheet: Sheet1
	KLC1TPR :TAMRA-TorsinAC-term			KLC2TPR :TAMRA-TorsinAC-term			KLC2TPR S328,454N:TAMRA-TorsinAC-term
concentration [μM]	FP %	SEM		FP %	SEM		FP %	SEM
0	0	0.830403		0	0.268728		0	1.32192
0.1	4.89715	0.653989		1.70394	0.585284		6.28648	1.06892
0.2	10.9748	0.832621		2.67762	0.467188		11.8246	0.946649
0.5	26.1103	0.709303		3.95558	0.742206		27.9898	0.946648
1	40.0187	0.600639		7.37867	0.468672		46.6996	1.037
2	52.4661	0.635448		11.8515	0.578722		64.661	0.970024
4	66.9472	0.591698		19.5345	0.225141		78.4314	1.01516
5	71.7157	0.725761		23.0793	0.339846		81.2753	0.934738
7	78.2375	0.59687		30.4123	0.369227
8	81.1945	0.587997		32.3292	1.12459		87.7114	1.07935
10	85.928	0.628426		37.9583	0.711643		89.6572	1.07934
12							91.0043	0.981499
15	91.4913	0.777298		46.4172			91.9024	0.946648
18							93.9979	1.07935
20	95.2899	0.606522		56.4582			93.9979	1.22517
