# Supplementary material for: Structural basis for isoform-specific kinesin-1 recognition of Y-acidic cargo adaptors
Source: eLife. 2018 Oct 15;7:e38362. doi: 10.7554/eLife.38362 (PMC6214655; doi:10.7554/eLife.38362)
Supplement: Figure 3—source data 1. [file elife-38362-fig3-data1.xlsx]

## Sheet: Sheet1
	WT			R266S			V305T			N343S			N386S			N469S
	Repeat 1	Repeat 2	Repeat 3	Repeat 1	Repeat 2	Repeat 3	Repeat 1	Repeat 2	Repeat 3	Repeat 1	Repeat 2	Repeat 3	Repeat 1	Repeat 2	Repeat 3	Repeat 1	Repeat 2	Repeat 3
Relative KLC1TPR bound	1	1	1	0.0806925	0.180506	0.064048	0.09527	0.188648	0.187907	0.26291	0.427115	0.349142	0.438041	0.276121	0.718216	0.273661	0.159817	0.269947
