# Supplementary material for: Structural basis for isoform-specific kinesin-1 recognition of Y-acidic cargo adaptors
Source: eLife. 2018 Oct 15;7:e38362. doi: 10.7554/eLife.38362 (PMC6214655; doi:10.7554/eLife.38362)
Supplement: Figure 3—source data 2. [file elife-38362-fig3-data2.xlsx]

## Sheet: Sheet1
	KLC1TPR :TAMRA-JIP1C-term			KLC2TPR :TAMRA-JIP1C-term			KLC2TPR S328N:TAMRA-JIP1C-term			KLC2TPR S454N:TAMRA-JIP1C-term			KLC2TPR S328,4548N:TAMRA-JIP1C-term
concentration [μM]	FP %	SEM		FP %	SEM		FP %	SEM		FP %	SEM		FP %	SEM
0	0	0.428586		0	0.891906		0	0.38686		0	0.757497		0	0.580102
0.1	4.47804	0.3963					0.389039	0.314718		-0.911023	0.648155		6.04651	0.580102
0.2	13.0702	0.351801		-1.14436	0.653793		4.24836	0.522654		-0.809798	0.563596		10.0775	0.490275
0.5	32.7456	0.478458		-0.973012	0.665798		14.1923	0.345178		-1.01225	0.572614		24.4961	1.05153
1	56.0034	0.366516		-0.159108	0.652733		27.8867	0.408182		-0.101223	0.648155		44.9612	0.490272
2	71.9144	0.429955		1.32183	0.633369		45.456	0.285675		1.82205	0.598854		63.7209	0.438515
4	80.5346	0.311974		4.1246	0.643051		62.2938	0.275311		5.56737	0.563596		77.2093	0.917221
5	82.5217	0.456902		5.20164	0.683095		67.1958	0.29567		7.38941	0.563596		79.5349	0.580109
7	85.7543	0.422142		7.61887	0.63858		73.3738	1.10258
8	87.2936	0.369705		8.64084	0.658929		76.5795	0.658768		12.7543	0.648155		85.4263	0.620148
10	89.8265	0.40799		8.89175			80.4389	0.289047		16.0948	0.572615		88.6822	0.490272
12										18.5241	0.648155		90.0775	0.490272
15	95.7599	0.407517		13.4263			82.6331			20.9535	0.648155		91.3178	0.580093
18										24.4964	0.545113		92.4031	1.14979
20	97.3412			17.5754			89.169			26.6221	0.598854		93.4884	0.580101
