# Supplementary material for: Structural basis for isoform-specific kinesin-1 recognition of Y-acidic cargo adaptors
Source: eLife. 2018 Oct 15;7:e38362. doi: 10.7554/eLife.38362 (PMC6214655; doi:10.7554/eLife.38362)
Supplement: Figure 3—supplement figure 1—source data 1. [file elife-38362-fig3.xlsx]

## Sheet: Sheet1
	Fluorescence Polarization [mP]
KLCTPR [μM]							KLC1TPR:TAMRA-JIP1C-term			KLC1TPR:TAMRA-JIP1amidated C-term
							repeat 1	repeat 2	repeat 3	repeat 1	repeat 2	repeat 3
0							96.9	99.4	98.1	97	97	95
0.1							109.9	108.7	107.8	101	102	102
0.2							130.1	129	128.7	99	98	96
0.5							177.8	174.8	175.8	97	92	95
1							230.7	231.5	232.4	97	95	96
2							268.1	269.6	270.6	103	105	103
4							290.3	289.7	289.9	113	111	112
5							296.2	293.4	294.5	118	117	116
7							302.2	303.7	301.3
8							305.1	306.3	306.8	126	127	129
10							312.7	312.8	310.8	136	137	138
12										140	143	139
15							325	327.2	326.5	156	154	154
18										165	168	170
20							330			170	171	171
