# Supplementary material for: Structural basis for isoform-specific kinesin-1 recognition of Y-acidic cargo adaptors
Source: eLife. 2018 Oct 15;7:e38362. doi: 10.7554/eLife.38362 (PMC6214655; doi:10.7554/eLife.38362)
Supplement: Figure 4—source data 1. [file elife-38362-fig4-data1.xlsx]

## Sheet: Sheet1
	Fluorescence Polarization [mP]
log10[SKIPWD] [nM]	SKIPWD vs TAMRA-JIP1C-term
	repeat 1	repeat 2	repeat 3
5	93.6	94.1	93.2
4.69897	101.2	99	98
4.39794	115.8	115.9	113.3
4.09691	134	133.6	131.3
3.79588	168.3	169.2	164.7
3.49485	197.7	199	198.1
3.19382	219.7	216.3	216
2.89279	236.8	234.5	235
2.59176	231.4	231.6	227.4
1.9897	248.1	250	247
1.68867		244
