# Supplementary material for: Structural basis for isoform-specific kinesin-1 recognition of Y-acidic cargo adaptors
Source: eLife. 2018 Oct 15;7:e38362. doi: 10.7554/eLife.38362 (PMC6214655; doi:10.7554/eLife.38362)
Supplement: Figure 4—source data 2. [file elife-38362-fig4-data2.xlsx]

## Sheet: Sheet1
	KLC1TPR :TAMRA-SKIPWD			KLC1extTPR :TAMRA-SKIPWD			KLC1TPR:TAMRA-JIP1C-term			KLC1extTPR:TAMRA-JIP1C-term
concentration [μM]	FP %	SEM		FP %	SEM		FP %	SEM		FP %	SEM
0	0	0.363049		0	0.407261		0	0.428586		0	0.949363
0.1							4.47804	0.3963
0.2	21.0464	0.392136					13.0702	0.351801		5.54247	0.812975
0.4956				7.4874	0.287977
0.5	44.316	0.592861					32.7456	0.478458		18.1818	0.700592
0.9912				14.3988	0.380958
1	60.916	0.574028					56.0034	0.366516		30.9782	0.731573
1.9824				19.7264	0.321968
2	77.3677	0.363052					71.9144	0.429955		47.9824	0.852936
3.9648				32.5414	0.519157
4	86.8534	0.392136					80.5346	0.311974		65.1437	0.717293
4.956				37.869	0.321968
5	88.3356	0.296425					82.5217	0.456902		69.6028	0.803833
7							85.7543	0.422142		76.1344	0.684936
7.9296				49.1001	0.47755
8	91.2998	0.468697					87.2936	0.369705		78.4582	0.726502
8.9208				51.1159	0.380962
9.912				54.2837	0.593681
10	93.8195	0.256706					89.8265	0.40799		81.6298	0.778114
12	95.1534	0.363052
14.868				63.4989	0.321968
15	95.4498	0.392136					95.7599	0.407517		87.2036	0.786934
18	96.1909	0.825233
19.824				69.6904	0.287979
20	97.5248	0.825226					97.3412			89.1349	1.17296
21	96.6355	0.784286
24.78				75.306	0.380959
29.736				78.9057	0.407265
30										93.4527	0.68457
39.648				84.0893	0.407265
