# Supplementary material for: Structural basis for isoform-specific kinesin-1 recognition of Y-acidic cargo adaptors
Source: eLife. 2018 Oct 15;7:e38362. doi: 10.7554/eLife.38362 (PMC6214655; doi:10.7554/eLife.38362)
Supplement: Figure 5—source data 1. [file elife-38362-fig5-data1.xlsx]

## Sheet: Sheet1
Western blot quantification data for 3 repeats figure 5A.
	Relative FLAG-JIP1 Bound (normalised to JIP1 / TPR-WT)
	Lane 2	Lane 4	Lane 5	Lane 7
	JIP1 / TPR-WT	JIP1 / JIP3 / TPR-WT	JIP1 / TPR-R266S	JIP1 / JIP3 / TPR-R266S
Repeat 1	1	2.73218	0.0350972	0.170626
Repeat 2	1	1.09145	0.0118083	0.00823009
Repeat 3	1	2.28182	0.0188182	0.085
	Relative FLAG-JIP3 Bound (normalised to JIP1 / JIP3 / TPR-WT)
	Lane 3	Lane 4	Lane 6	Lane 7
	JIP3 / TPR-WT	JIP1 / JIP3 / TPR-WT	JIP3 / TPR-R266S	JIP1 / JIP3 / TPR-R266S
Repeat 1	0.00338309	1	0.0404229	0.202736
Repeat 2	0	1	0.069844	0.012773
Repeat 3	0.000207547	1	0	0.0404403
